# Supplementary material for: Why plants make puzzle cells, and how their shape emerges
Source: eLife journal article supplement (doi:10.7554/elife.32794), 2018-02-26
Supplement: supp [file elife-32794-supp-v1.zip]

Archive with 15 entries (15 files):
- elife_poa_e32794_Movie_2.mp4
- elife_poa_e32794_Movie_8.mp4
- elife_poa_e32794_Movie_1.mp4
- elife_poa_e32794_Movie_5.mp4
- elife_poa_e32794_Figure_5_source_data_1.xlsx
- elife_poa_e32794_Movie_3.mp4
- elife_poa_e32794_Movie_9.mp4
- elife_poa_e32794_Appendix_Latex_Source_Files.zip
- elife_poa_e32794_Figure_5_source_data_2.xlsx
- elife_poa_e32794_Movie_4.mp4
- elife_poa_e32794_Movie_10.mp4
- elife_poa_e32794_Figure_6_source_data_1.xlsx
- elife_poa_e32794_Movie_7.mp4
- elife_poa_e32794_Transparent_Reporting_Form.pdf
- elife_poa_e32794_Movie_6.mp4
