# Supplementary material for: Why plants make puzzle cells, and how their shape emerges
Source: eLife journal article supplement (doi:10.7554/elife.32794), 2018-02-26
Supplement: supp [file elife-32794-supp-v1.zip › elife_poa_e32794_Figure_5_source_data_1.xlsx]

## Sheet: Sheet1
genotype	timepoint	sample name	total no. of cells segmented	no of cells included in average	average cell area [µm²]	SE	average LEC area [µm²]	SE
wt	1 DAG	5	304	61	531.415	10.7451	213.192	6.39413
		11	343	69	405.673	6.79537	176.579	4.70642
		12	274	55	447.557	7.88029	179.053	6.39102
		13	327	66	449.231	7.19064	189.084	4.43416
		14	368	74	374.166	43.496	150.122	34.9026
		15	380	76	400.412	8.05971	173.421	5.03514
		16	245	49	627.952	12.7082	224.962	7.10179
		17	282	57	470.965	7.13911	178.547	4.82149
		18	269	54	518.751	0.00362724	209.062	5.92779
		19	341	69	464.022	10.1018	198.416	5.63438
	2 DAG	2	599	120	1131.58	15.2658	339.454	8.41917
		3	304	61	1546.78	16.4086	408.74	14.3324
		4	438	88	1692.84	26.2761	467.412	12.5761
		5	408	82	1648.84	24.2266	384.465	10.7106
		6	501	101	1525.75	23.2938	383.056	9.0878
		7	376	76	1544.42	26.6806	411.292	12.064
		8	551	111	1222.09	13.8614	352.99	9.41456
		9	506	102	1275.44	17.1429	337.556	7.97052
		10	559	112	1395.03	21.2024	385.075	8.60879
	4 DAG	1	324	65	2410.31	61.214	616.027	16.9446
		3	408	82	1802.35	31.3546	523.062	14.0907
		3.1	332	67	2373	56.9415	580.237	15.0417
		4	265	53	2915.91	78.2764	791.042	20.8972
		5	311	63	2370.42	65.0219	619.632	16.1334
		6	371	75	2252.33	76.6641	616.99	24.2661
		7	262	53	2701.19	59.5734	599.121	22.0774
		8	231	47	2829.63	80.2294	711.888	21.2311
		9	239	48	2809.52	79.5206	807.734	31.1108
		10	198	40	3228.63	60.3729	643.24	20.2099
	6 DAG	1	254	51	3121.09	82.2233	820.009	25.8989
		3	276	56	2430.56	63.876	674.798	19.2612
		4	136	28	4539.14	136.965	949.454	32.1589
		5	181	37	3793.2	138.18	1124.19	48.9532
		5.1	220	44	3141.99	85.6053	785.89	23.9989
		6	169	34	4345.33	131.537	884.314	30.2284
		6.1	226	46	3529.74	139.983	904.987	35.2938
spike1	1 DAG	2.4	207	42	531.278	10.2042	256.405	10.7909
		2.5	261	53	444.067	6.45457	184.667	4.46656
		2.6	239	48	449.727	5.61606	203.565	7.2971
		5.1	264	53	387.404	7.24473	150.262	4.62874
		5.2	359	72	420.604	7.05368	208.586	5.99262
		5.3	337	68	389.715	7.41046	184.468	6.13625
	2 DAG	2.3	273	55	473.84	9.64801	219.074	7.74517
		2.4	213	43	821.46	24.6916	381.737	20.506
		2.6	310	62	1196.81	40.4334	513.196	19.9793
		2.8	408	82	600.869	13.4945	283.641	8.94703
		2.9	340	68	1094.94	31.1228	488.291	17.6322
		2.1	414	83	848.429	19.4364	366.082	11.6019
		2.11	414	83	733.212	20.3686	340.074	11.6994
	4 DAG	2.2	280	56	2699.15	78.1775	1023.68	40.1445
		2.3	264	53	2400.94	47.8558	855.678	35.4254
		2.6	432	87	1599.65	27.4607	633.526	24.0321
		2.7	262	53	3476.06	113.445	1250.91	54.4276
	6 DAG	2.1	299	60	4593.69	136.072	1655.35	60.083
		2.2	308	62	4049.13	125.846	1329.49	54.8784
		2.3	189	38	3414.77	128.331	1025.44	51.4579
		2.7	297	60	4098.98	114.128	1519.84	65.0282
		2.8	122	25	7683.71	329.922	2113.5	112.073
		2.9	145	29	5186.85	165.845	1782.16	98.0496
		2.1	269	54	4276.01	95.6396	1573.21	57.5608
		2.11	194	39	6729.78	201.054	2267.04	87.2086
		2.12	270	54	4034.08	111.758	1407.39	95.3363
