# Supplementary material for: Why plants make puzzle cells, and how their shape emerges
Source: eLife journal article supplement (doi:10.7554/elife.32794), 2018-02-26
Supplement: supp [file elife-32794-supp-v1.zip › elife_poa_e32794_Figure_5_source_data_2.xlsx]

## Sheet: Sheet1
		no. of samples	mean average cell area [µm²]	SE	mean average LEC area [µm²]	SE
wt	1 DAG	10	469.014	23.6229	189.244	7.05995
	2 DAG	9	1442.53	65.4953	385.56	13.6412
	4 DAG	10	2569.33	128.658	650.897	28.9397
	6 DAG	7	3557.29	279.188	877.663	53.3675
spike1	1 DAG	6	437.132	21.6523	197.992	14.369
	2 DAG	7	824.223	96.8112	370.299	39.5758
	4 DAG	4	2543.95	387.843	940.949	130.607
	6 DAG	9	4896.33	471.166	1630.38	128.241
