# Supplementary material for: Why plants make puzzle cells, and how their shape emerges
Source: eLife journal article supplement (doi:10.7554/elife.32794), 2018-02-26
Supplement: supp [file elife-32794-supp-v1.zip › elife_poa_e32794_Figure_6_source_data_1.xlsx]

## Sheet: Sheet1
		lobeyness		cell area [µm²]
Species	no. of cells	average	SE	average	SE
Althernathea dentata	66	1.15018	0.00775452	3754.53	209.863
Calotropis gigantea	369	1.049	0.00255094	210.635	5.3519
Cassia spectabilis	162	1.03084	0.000877758	452.998	7.4391
Catharanthus roseus	295	1.06332	0.00132794	1036.45	18.497
Dahlia indica	123	1.09014	0.00306332	1359.46	45.8459
Dahlia pinnata	57	1.15785	0.00731294	4476.99	211.097
Erythrina standleyana	71	1.02969	0.00125035	970.461	24.9887
Impatiens balsamica	80	1.06795	0.00353612	885.556	33.517
Ipomea tricolor	92	1.37476	0.0159896	3060.09	134.693
Jacquemontia tamnifolia	140	1.34804	0.00653403	1946.97	32.2106
Lactuca sativa	29	1.31443	0.030077	1963.02	148.152
Mussadena glabra	132	1.04415	0.00125911	571.125	10.1937
Nicotiana tabacum	23	1.32903	0.0464693	8969.85	1559.41
Nycanthes arbor-tritis	332	1.05967	0.000663349	871.115	10.5447
Pisidium guajava	101	1.02985	0.000884005	712.926	17.1203
Solanum nigrum	163	1.23187	0.00956482	1820.14	78.4533
Tecoma stans	111	1.07728	0.00337434	535.532	11.9602
Thunbergia mysorensis	148	1.09809	0.00348043	1996.63	58.0546
Torrenia glabra	55	1.15246	0.0127835	1111.29	78.9344
